# Supplementary material for: Rumen Fermentation, Digestive Enzyme Activity, and Bacteria Composition between Pre-Weaning and Post-Weaning Dairy Calves
Source: MDPI journal article supplement (doi:10.3390/ani11092527), 2021-08-28
Supplement: s1 [file s1]

**Table S1.** Nutrient composition of starter and oat grass (Dry matter basis)

| Nutrient level <sup>1</sup> | Starter <sup>2</sup> | Oat grass |
|-----------------------------|----------------------|-----------|
| DM                          | 86.94                | 91.79     |
| CP                          | 20.20                | 6.28      |
| EE                          | 4.38                 | 1.73      |
| Ash                         | 5.43                 | 7.95      |
| NDF                         | 11.62                | 54.34     |
| ADF                         | 4.88                 | 30.41     |
| Starch                      | 33.95                | 1.23      |
| Ca                          | 0.89                 | 0.26      |
| P                           | 0.50                 | 0.20      |

<sup>1</sup> DM: dry matter, CP: crude protein, EE: ether extract, NDF: neutral detergent fiber, ADF: acid detergent fiber, Ca: calcium, P: phosphorus.

<sup>2</sup> Starter composition: 47.65% Cornmeal, 18.47% Soybean meal, 20.33% Extruded soybean, 5.26% Corn gluten meal, 2.74% Sugarcane molasses, 5.55% Mineral-vitamin premix.

**Table S2.** The enzymes and their corresponding reacting substrate and wavelength

| Enzyme                  | React substrate                                                                                                       | Be tested product                                              | Wavelength/nm |
|-------------------------|-----------------------------------------------------------------------------------------------------------------------|----------------------------------------------------------------|---------------|
| dehydrogenase           | nitrogen tetrazolium salt (CN <sub>4</sub> H <sub>2</sub> )                                                           | formazan (CN <sub>4</sub> H <sub>4</sub> )                     | 460           |
| urease                  | Urea (CH <sub>4</sub> N <sub>2</sub> O)                                                                               | ammonia nitrate (NH <sub>3</sub> -N)                           | 578           |
| protease                | Casein (C <sub>81</sub> H <sub>125</sub> N <sub>22</sub> O <sub>39</sub> P)                                           | Tyrosine (C <sub>9</sub> H <sub>11</sub> NO <sub>3</sub> )     | 680           |
| lipase                  | p-nitrophenol butyrate (C <sub>10</sub> H <sub>11</sub> NO <sub>4</sub> )                                             | p-nitrophenol (C <sub>6</sub> H <sub>5</sub> NO <sub>2</sub> ) | 405           |
| glucosidase             | p-nitrophenyl-β-D-glucopyranoside (C <sub>12</sub> H <sub>15</sub> NO <sub>8</sub> )                                  | p-nitrophenol (C <sub>6</sub> H <sub>5</sub> NO <sub>2</sub> ) | 405           |
| carboxymethyl cellulase | sodium carboxymethylcellulose (C <sub>6</sub> H <sub>7</sub> O <sub>2</sub> (OH) <sub>2</sub> OCH <sub>2</sub> COONa) | reducing sugars                                                | 540           |
| cellobiohydrolase       | microcrystalline cellulose ((C <sub>6</sub> H <sub>10</sub> O <sub>5</sub> ) <sub>n</sub> )                           | reducing sugars                                                | 540           |
| amylase                 | Starch ((C <sub>6</sub> H <sub>10</sub> O <sub>5</sub> ) <sub>n</sub> )                                               | reducing sugars                                                | 540           |
| xylanase                | Xylan ((C <sub>5</sub> H <sub>8</sub> O <sub>4</sub> ) <sub>n</sub> )                                                 | reducing sugars                                                | 540           |

Under alkaline conditions, the produced reducing sugars can react with 3,5-Dinitrosalicylic acid (C<sub>6</sub>H<sub>5</sub>NO<sub>3</sub>) reacts to produce a brown-red substance, which can be measured under 540nm wavelength.

All the chemical reagents were produced from the company of Suzhou Grace Biotechnology Co., Ltd, Jiangsu, China.
